# Supplementary material for: Survival Benefits of Chemotherapy for Patients with Advanced Pancreatic Cancer in A Clinical Real-World Cohort
Source: MDPI journal article supplement (doi:10.3390/cancers11091326), 2019-09-07
Supplement: s1 [file s1]

**Table S2**

| <b>Table S2: Stratification of overall survival (OS) by metastatic stage</b> |                              |                 |                               |                           |
|------------------------------------------------------------------------------|------------------------------|-----------------|-------------------------------|---------------------------|
| <b>Treatment</b>                                                             |                              | <b>Total</b>    | <b>Non-metastatic disease</b> | <b>Metastatic disease</b> |
| Gemcitabine                                                                  | Patients (N)                 | 185*            | 65                            | 119                       |
|                                                                              | Median OS – months (95 % CI) | 6.6 (5.5–7.7)   | 8.2 (6.6–9.7)                 | 5.7 (4.8–6.6)             |
| Gemcitabine/<br>capecitabine                                                 | Patients (N)                 | 60              | 22                            | 38                        |
|                                                                              | Median OS – months (95 % CI) | 10.6 (7.8–13.3) | 12.1 (8.8–15.4)               | 8.7 (4.6–12.9)            |
| Gemcitabine/<br>nab-paclitaxel                                               | Patients (N)                 | 66              | 6                             | 57                        |
|                                                                              | Median OS – months (95 % CI) | 9.8 (7.9–11.8)  | 9.2 (3.4–15)                  | 9.8 (7.7–11.9)            |
| 5-FU/oxaliplatin/<br>irinotecan                                              | Patients (N)                 | 31              | 15                            | 16                        |
|                                                                              | Median OS – months (95 % CI) | 9.9 (8.1–11.7)  | 9.9 (7–12.8)                  | 10.3 (8.6–12)             |
| 5-FU/oxaliplatin                                                             | Patients (N)                 | 35              | 12                            | 23                        |
|                                                                              | Median OS – months (95 % CI) | 5.8 (4.5–7)     | 8.4 (4–12.9)                  | 5.2 (3.6–6.8)             |
| *For four patients, no information on the M-stage was available              |                              |                 |                               |                           |
