# Supplementary material for: Survival Benefits of Chemotherapy for Patients with Advanced Pancreatic Cancer in A Clinical Real-World Cohort
Source: MDPI journal article supplement (doi:10.3390/cancers11091326), 2019-09-07
Supplement: s1 [file s1]

**Table S3**

| <b>Table S3: Hazard ratio for death according to treatment and stratified by previous pancreatic surgery</b>                                                                                                                                                                                                                                                                                              |                    |                   |  |                    |                     |
|-----------------------------------------------------------------------------------------------------------------------------------------------------------------------------------------------------------------------------------------------------------------------------------------------------------------------------------------------------------------------------------------------------------|--------------------|-------------------|--|--------------------|---------------------|
| Treatment                                                                                                                                                                                                                                                                                                                                                                                                 | With surgery       |                   |  | Without surgery§   |                     |
|                                                                                                                                                                                                                                                                                                                                                                                                           | Number of patients | HR (95% CI)#      |  | Number of patients | HR (95% CI)#        |
| Gemcitabine                                                                                                                                                                                                                                                                                                                                                                                               | 31                 | 1 (ref)           |  | 154                | 1 (ref)             |
| Gemcitabine/capecitabine                                                                                                                                                                                                                                                                                                                                                                                  | 5                  | 0.48 (0.15–1.60)  |  | 55                 | 0.54 (0.37–0.78)**  |
| Gemcitabine/nab-paclitaxel                                                                                                                                                                                                                                                                                                                                                                                | 8                  | 0.55 (0.18–1.70)  |  | 58                 | 0.54 (0.38–0.79)**  |
| 5-FU/oxaliplatin/irinotecan                                                                                                                                                                                                                                                                                                                                                                               | 2                  | 0.53 (0.06–4.35)  |  | 29                 | 0.48 (0.29–0.81)**  |
| 5-FU/oxaliplatin                                                                                                                                                                                                                                                                                                                                                                                          | 30                 | 1.15 (0.59–2.27)  |  | 5                  | 1.90 (0.74–4.85)    |
| Best supportive care                                                                                                                                                                                                                                                                                                                                                                                      | 62                 | 2.33 (1.20–4.50)* |  | 144                | 2.81 (2.06–3.82)*** |
| HR, hazard ratio; CI, confidence interval.<br>*, p < 0.05; **, p < 0.01; ***, p < 0.001.<br>#, multivariate logistic regression; models were adjusted for age, sex, BMI, alcohol consumption, smoking status, diabetes, tumor stage, tumor grade, ECOG score, and CA19-9 level.<br>§, this model violated the proportional-hazard assumption so additional flexible parametric survival models were used. |                    |                   |  |                    |                     |
