# Supplementary material for: Survival Benefits of Chemotherapy for Patients with Advanced Pancreatic Cancer in A Clinical Real-World Cohort
Source: MDPI journal article supplement (doi:10.3390/cancers11091326), 2019-09-07
Supplement: s1 [file s1]

**Figure S1**

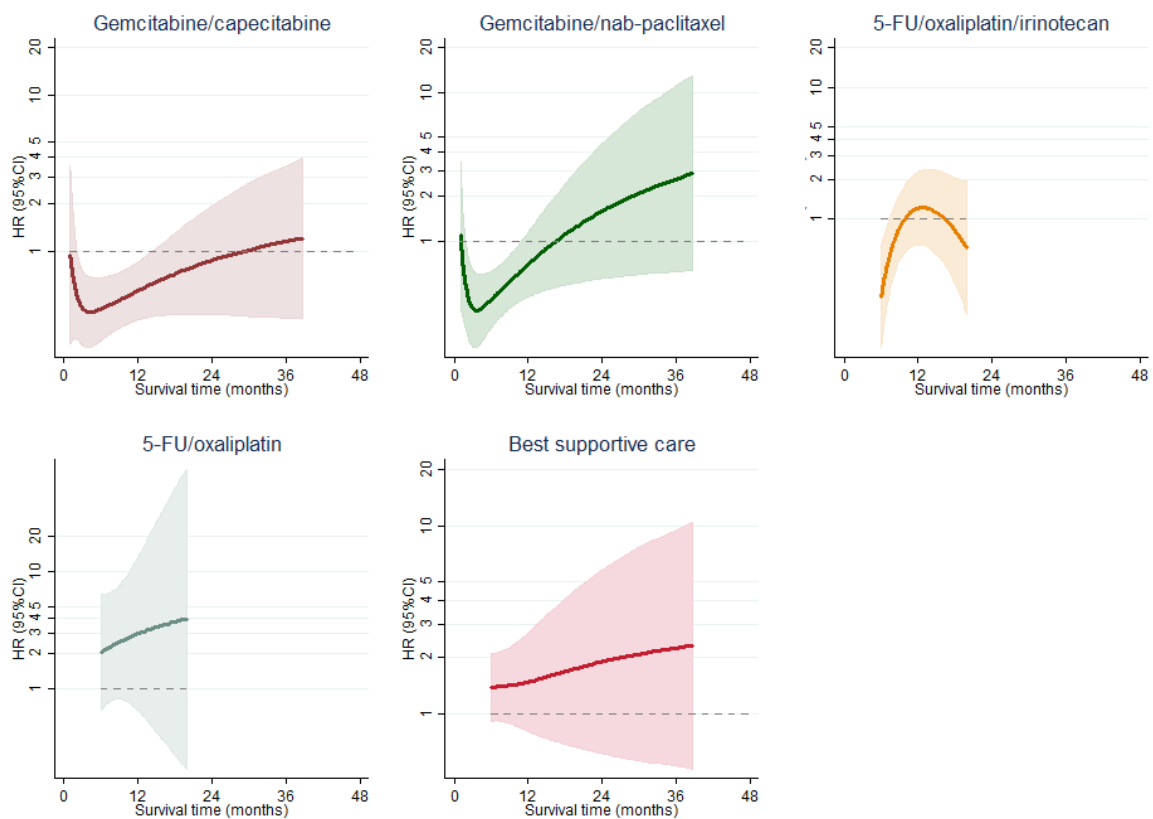

**Figure S1 – Flexible parametric survival model of the HR for death according to first-line chemotherapy compared to monotherapy with gemcitabine among pancreatic cancer patients without previous surgery.** The models were adjusted for age, sex, BMI, alcohol consumption, smoking status, diabetes, tumor stage, tumor grade, ECOG score, and CA19-9 level.
