# Supplementary material for: Survival Benefits of Chemotherapy for Patients with Advanced Pancreatic Cancer in A Clinical Real-World Cohort
Source: MDPI journal article supplement (doi:10.3390/cancers11091326), 2019-09-07
Supplement: s1 [file s1]

**Table S1**

| Table S1: Baseline characteristics of patients according to second-line therapy |                         |                                            |                              |                                 |                                   |                     |                                         |                              |             |
|---------------------------------------------------------------------------------|-------------------------|--------------------------------------------|------------------------------|---------------------------------|-----------------------------------|---------------------|-----------------------------------------|------------------------------|-------------|
| Characteristic                                                                  | Gemcitabine<br>(N = 27) | Gemcitabine/<br>nab-paclitaxel<br>(N = 23) | 5-FU/oxaliplatin<br>(N = 53) | 5-FU/<br>irinotecan<br>(N = 19) | 5-FU;<br>capecitabine<br>(N = 13) | Other<br>(N = 13)   | Best<br>supportive<br>care<br>(N = 147) | All<br>patients<br>(N = 295) | P-<br>value |
| First-line regimen – no. (%)                                                    |                         |                                            |                              |                                 |                                   |                     |                                         |                              |             |
| Gemcitabine                                                                     | –                       | 2 (8.7)                                    | 15 (28.3)                    | 1 (5.3)                         | 7 (53.8)                          | 4 (30.8)            | 96 (65.3)                               | 125 (42.4)                   | .000        |
| Gemcitabine/capecitabine                                                        | 10 (37)                 | 3 (13)                                     | 20 (37.7)                    | 1 (5.3)                         | 2 (15.4)                          | 4 (30.8)            | 14 (9.5)                                | 54 (18.3)                    |             |
| Gemcitabine/nab-paclitaxel                                                      | 7 (25.9)                | –                                          | 15 (28.3)                    | 12 (63.2)                       | 2 (15.4)                          | 1 (7.7)             | 15 (10.2)                               | 52 (17.6)                    |             |
| 5-FU/oxaliplatin/irinotecan                                                     | 6 (22.2)                | 15 (65.2)                                  | 2 (3.8)                      | 1 (5.3)                         | –                                 | 2 (15.4)            | 3 (2)                                   | 29 (9.8)                     |             |
| 5-FU/oxaliplatin                                                                | 4 (14.8)                | 2 (8.7)                                    | –                            | 4 (21.1)                        | 1 (7.7)                           | –                   | 16 (10.9)                               | 27 (9.2)                     |             |
| Other                                                                           | –                       | 1 (4.3)                                    | 1 (1.9)                      | –                               | 1 (7.7)                           | 2 (15.4)            | 3 (2)                                   | 8 (2.7)                      |             |
| Sex – no. (%)                                                                   |                         |                                            |                              |                                 |                                   |                     |                                         |                              |             |
| Female                                                                          | 14 (51.9)               | 6 (26.1)                                   | 20 (37.7)                    | 9 (47.4)                        | 9 (69.2)                          | 6 (46.2)            | 67 (45.6)                               | 131 (44.4)                   | .231        |
| Male                                                                            | 13 (48.1)               | 17 (73.9)                                  | 33 (62.3)                    | 10 (52.6)                       | 4 (30.8)                          | 7 (53.8)            | 80 (54.4)                               | 164 (55.6)                   |             |
| Age at diagnosis – years                                                        |                         |                                            |                              |                                 |                                   |                     |                                         |                              |             |
| Mean (range)                                                                    | 64.3<br>(51.3–77)       | 62<br>(39.7–76.1)                          | 64.9<br>(38–81.6)            | 66.2<br>(55.5–80.5)             | 70.3<br>(57.3–82.8)               | 66.6<br>(48.9–76.4) | 69.7<br>(46.6–83.8)                     | 68.3<br>(38–83.8)            | .000        |
| Body mass index – no. (%)*                                                      |                         |                                            |                              |                                 |                                   |                     |                                         |                              |             |
| ≤ 18.4                                                                          | 2 (7.4)                 | –                                          | 3 (5.7)                      | –                               | 1 (7.7)                           | –                   | 11 (7.5)                                | 17 (5.8)                     | .694        |
| 18.5–29.9                                                                       | 23 (85.2)               | 22 (95.7)                                  | 49 (92.5)                    | 19 (100)                        | 11 (84.6)                         | 13 (100)            | 125 (85)                                | 262 (88.8)                   |             |
| ≥ 30.0                                                                          | 2 (7.4)                 | 1 (4.3)                                    | 1 (1.9)                      | –                               | 1 (7.7)                           | –                   | 10 (6.8)                                | 15 (5.1)                     |             |
| ECOG performance status – no. (%)*                                              |                         |                                            |                              |                                 |                                   |                     |                                         |                              |             |
| 0                                                                               | 9 (33.3)                | 13 (56.5)                                  | 25 (47.2)                    | 7 (36.8)                        | 7 (53.8)                          | 3 (23.1)            | 37 (25.2)                               | 101 (34.2)                   | .000        |
| 1                                                                               | 11 (40.7)               | 9 (39.1)                                   | 19 (35.8)                    | 9 (47.4)                        | 3 (23.1)                          | 7 (53.8)            | 79 (53.7)                               | 137 (46.4)                   |             |
| 2                                                                               | 1 (3.7)                 | 1 (4.3)                                    | 6 (11.3)                     | 1 (5.3)                         | 2 (15.4)                          | 1 (7.7)             | 29 (19.7)                               | 41 (13.9)                    |             |
| ≥3                                                                              | 4 (14.8)                | –                                          | 1 (1.9)                      | –                               | 1 (7.7)                           | 2 (15.4)            | 2 (1.4)                                 | 10 (3.4)                     |             |
| Diabetes – no. (%)*†                                                            |                         |                                            |                              |                                 |                                   |                     |                                         |                              |             |
| yes                                                                             | 5 (18.5)                | 5 (21.7)                                   | 8 (15.1)                     | 3 (15.8)                        | 5 (38.5)                          | 4 (30.8)            | 47 (32)                                 | 77 (26.1)                    | .167        |
| no                                                                              | 22 (81.5)               | 18 (78.3)                                  | 44 (83)                      | 16 (84.2)                       | 8 (61.5)                          | 8 (61.5)            | 100 (68)                                | 216 (73.2)                   |             |
| Alcohol abuse – no. (%)*†                                                       |                         |                                            |                              |                                 |                                   |                     |                                         |                              |             |
| yes                                                                             | –                       | 1 (4.3)                                    | 1 (1.9)                      | 1 (5.3)                         | 2 (15.4)                          | –                   | 8 (5.4)                                 | 13 (4.4)                     | .495        |
| no                                                                              | 23 (85.2)               | 22 (95.7)                                  | 45 (84.9)                    | 18 (94.7)                       | 11 (84.6)                         | 10 (76.9)           | 127 (86.4)                              | 256 (86.8)                   |             |
| former                                                                          | 2 (7.4)                 | –                                          | 1 (1.9)                      | –                               | –                                 | 1 (7.7)             | 4 (2.7)                                 | 8 (2.7)                      |             |
| Smoking – no. (%)*†                                                             |                         |                                            |                              |                                 |                                   |                     |                                         |                              |             |
| yes                                                                             | 6 (22.2)                | 2 (8.7)                                    | 6 (11.3)                     | –                               | 2 (15.4)                          | 1 (7.7)             | 33 (22.4)                               | 50 (16.9)                    | .403        |
| no                                                                              | 9 (33.3)                | 12 (52.2)                                  | 21 (39.6)                    | 8 (42.1)                        | 6 (46.2)                          | 6 (46.2)            | 60 (40.8)                               | 122 (41.4)                   |             |
| former                                                                          | 10 (37)                 | 9 (39.1)                                   | 19 (35.8)                    | 11 (57.9)                       | 5 (38.5)                          | 4 (30.8)            | 47 (32)                                 | 105 (35.6)                   |             |
| Primary tumor location – no. (%)*                                               |                         |                                            |                              |                                 |                                   |                     |                                         |                              |             |
| Head                                                                            | 15 (55.6)               | 14 (60.9)                                  | 27 (50.9)                    | 10 (52.6)                       | 7 (53.8)                          | 5 (38.5)            | 91 (61.9)                               | 169 (57.3)                   | .382        |
| Body                                                                            | 4 (14.8)                | 7 (30.4)                                   | 10 (18.9)                    | 2 (10.5)                        | 1 (7.7)                           | 1 (7.7)             | 24 (16.3)                               | 49 (16.6)                    |             |
| Tail                                                                            | 2 (7.4)                 | 2 (8.7)                                    | 3 (5.7)                      | 3 (15.8)                        | 2 (15.4)                          | 2 (15.4)            | 14 (9.5)                                | 28 (9.5)                     |             |
| Overlapping                                                                     | 5 (18.5)                | –                                          | 10 (18.9)                    | 2 (10.5)                        | 1 (7.7)                           | 3 (23.1)            | 14 (9.5)                                | 35 (11.9)                    |             |
| Ampulla of Vater                                                                | –                       | –                                          | 3 (5.7)                      | 1 (5.3)                         | 1 (7.7)                           | 2 (15.4)            | 4 (2.7)                                 | 11 (3.7)                     |             |
| Metastasization – no. (%)‡                                                      |                         |                                            |                              |                                 |                                   |                     |                                         |                              |             |
| Non-local lymph nodes                                                           | 1 (3.7)                 | 1 (4.3)                                    | 4 (7.5)                      | 2 (10.5)                        | 1 (7.7)                           | 2 (15.4)            | 7 (4.8)                                 | 18 (6.1)                     | .716        |
| Liver                                                                           | 9 (33.3)                | 10 (43.5)                                  | 27 (50.9)                    | 12 (63.2)                       | 8 (61.5)                          | 5 (38.5)            | 69 (46.9)                               | 140 (47.5)                   | .433        |
| Lung                                                                            | 6 (22.2)                | 3 (13)                                     | 6 (11.3)                     | 1 (5.3)                         | 3 (23.1)                          | 1 (7.7)             | 26 (17.7)                               | 46 (15.6)                    | .550        |
| Peritoneum                                                                      | 4 (14.8)                | 5 (21.7)                                   | 7 (13.2)                     | 4 (21.1)                        | 2 (15.4)                          | 4 (30.8)            | 14 (9.5)                                | 40 (13.6)                    | .267        |
| Other                                                                           | –                       | –                                          | 2 (3.8)                      | –                               | 1 (7.7)                           | –                   | 15 (10.2)                               | 18 (6.1)                     | .156        |

# Kordes et al.: Real-world Outcomes of Pancreatic Cancer Treatment

| <i>cont.</i>                          | <i>Gemcitabine</i>  | <i>Gemcitabine/<br/>nab-paclitaxel</i> | <i>5-FU/oxaliplatin</i> | <i>5-FU/<br/>irinotecan</i> | <i>5-FU;<br/>capecitabine</i> | <i>Other</i>     | <i>Best supportive<br/>care</i> | <i>All<br/>patients</i> | <i>P-value</i> |
|---------------------------------------|---------------------|----------------------------------------|-------------------------|-----------------------------|-------------------------------|------------------|---------------------------------|-------------------------|----------------|
| No. of tumor sites – no. (%)‡         |                     |                                        |                         |                             |                               |                  |                                 |                         |                |
| 1                                     | 13 (48.1)           | 8 (34.8)                               | 16 (30.2)               | 5 (26.3)                    | 5 (38.5)                      | 4 (30.8)         | 64 (43.5)                       | 227 (38.2)              | .514           |
| 2                                     | 10 (37)             | 13 (56.5)                              | 32 (60.4)               | 12 (63.2)                   | 5 (38.5)                      | 7 (53.8)         | 61 (41.5)                       | 266 (44.7)              |                |
| ≥3                                    | 4 (14.8)            | 2 (8.7)                                | 5 (9.4)                 | 2 (10.5)                    | 3 (23.1)                      | 2 (15.4)         | 22 (15)                         | 100 (16.8)              |                |
| Morphology – no. (%)*                 |                     |                                        |                         |                             |                               |                  |                                 |                         |                |
| Adenocarcinoma                        | 21 (77.8)           | 19 (82.6)                              | 48 (90.6)               | 17 (89.5)                   | 12 (92.3)                     | 12 (92.3)        | 124 (84.4)                      | 253 (85.8)              | .404           |
| Other                                 | –                   | 1 (4.3)                                | –                       | 1 (5.3)                     | –                             | 1 (7.7)          | 2 (1.4)                         | 5 (1.7)                 |                |
| Carbohydrate antigen 19–9 – kE/l*§    |                     |                                        |                         |                             |                               |                  |                                 |                         |                |
| Median (IQR)                          | 1390<br>(95–7609)   | 306<br>(120–2932.5)                    | 965<br>(191–4719.5)     | 849.5<br>(68.8–4900)        | 593<br>(78.5–2439.3)          | 80<br>(16–2949)  | 574<br>(131–3751.8)             | 708<br>(101.8–3855.3)   | .357           |
| Surgery                               |                     |                                        |                         |                             |                               |                  |                                 |                         |                |
| Tumor resection – no. (%)             | 2 (7.4)             | 3 (13)                                 | 7 (13.2)                | 5 (26.3)                    | 4 (30.8)                      | 1 (7.7)          | 39 (26.5)                       | 61 (20.7)               | .085           |
| Median time to relapse – months (IQR) | 15.4<br>(14.2–16.5) | 13.1<br>(9.6–21.5)                     | 3.8<br>(0.9–7.4)        | 7.7<br>(5–10.3)             | 10.5<br>(8.2–12.5)            | 5.3<br>(5.3–5.3) | 11.8<br>(8.4–15.4)              | 9.4<br>(5.8–14.2)       | .067           |
| Adjuvant chemotherapy – no. (%)¶      |                     |                                        |                         |                             |                               |                  |                                 |                         |                |
| Total                                 | 2 (7.4)             | 3 (13)                                 | 3 (5.7)                 | 5 (26.3)                    | 4 (30.8)                      | 1 (7.7)          | 28 (19)                         | 46 (15.6)               | .089           |
| Completed                             | 2 (7.4)             | 2 (8.7)                                | 2 (3.8)                 | 3 (15.8)                    | 2 (15.4)                      | –                | 22 (15)                         | 33 (11.2)               |                |
| Interrupted                           | –                   | 1 (4.3)                                | 1 (1.9)                 | 2 (10.5)                    | 2 (15.4)                      | 1 (7.7)          | 6 (4.1)                         | 13 (4.4)                |                |
| Interventions at diagnosis – no. (%)  |                     |                                        |                         |                             |                               |                  |                                 |                         |                |
| ERCP/PTC                              | 14 (51.9)           | 12 (52.2)                              | 23 (43.4)               | 8 (42.1)                    | 7 (53.8)                      | 5 (38.5)         | 71 (48.3)                       | 140 (47.5)              | .919           |
| Exploration                           | 2 (7.4)             | 4 (17.4)                               | 6 (11.3)                | 2 (10.5)                    | 1 (7.7)                       | 3 (23.1)         | 12 (8.2)                        | 30 (10.2)               | .248           |

\*Percent missing up to 100 = no information available. †According to physician's note. ‡Percent missing up to 100 = no distant metastases. § Reference interval <34 kE/l. Abbreviations: ECOG = Eastern Cooperative Oncology Group; ERCP = Endoscopic retrograde cholangiopancreatography; IQR = Interquartile range; n/a = not applicable; PTC = Percutaneous transhepatic cholangiography.
