# Supplementary material for: Survival Benefits of Chemotherapy for Patients with Advanced Pancreatic Cancer in A Clinical Real-World Cohort
Source: Cancers (Basel). 2019 Sep 7;11(9):1326. doi: 10.3390/cancers11091326 (PMC6769947; doi:10.3390/cancers11091326)
Supplement: Supplementary file 1 [file cancers-11-01326-s001.zip]

Archive with 9 entries (8 files):
- Figure S1.pdf
- __MACOSX/
- __MACOSX/._Figure S1.pdf
- Table S1.pdf
- __MACOSX/._Table S1.pdf
- Table S2.pdf
- __MACOSX/._Table S2.pdf
- Table S3.pdf
- __MACOSX/._Table S3.pdf
